# Supplementary material for: Visualization of spatiotemporal dynamics of human glioma stem cell invasion
Source: PubMed Central journal article supplement (PMC6503361; doi:10.1186/s13041-019-0462-3), 2019-05-06

**Additional file 1**

**FLAIR**

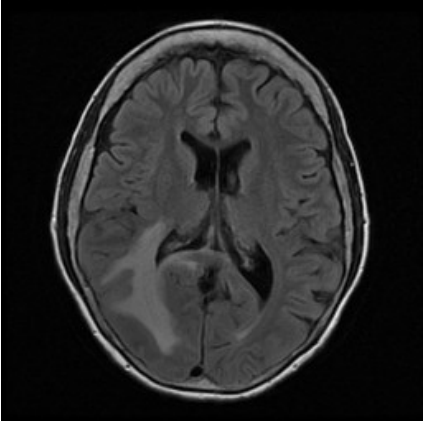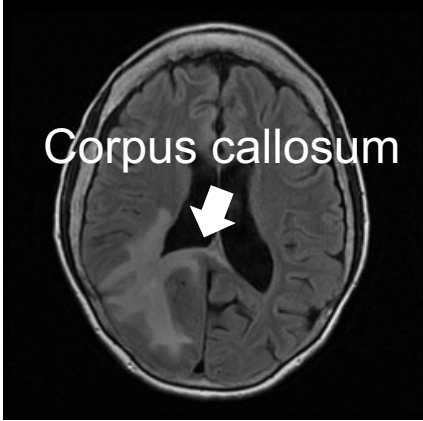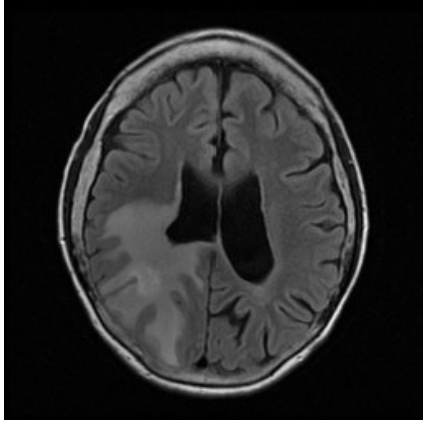

**Gd +**

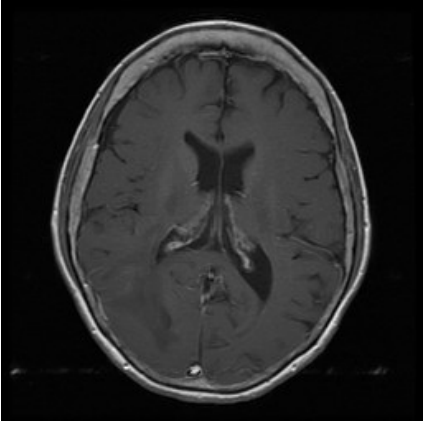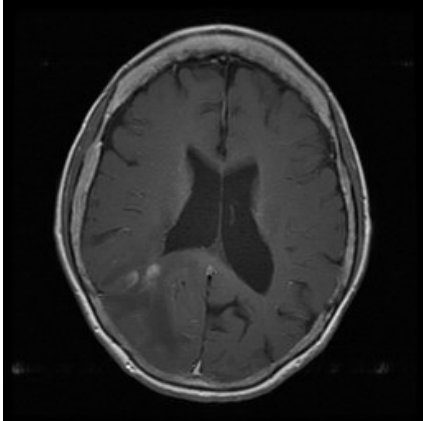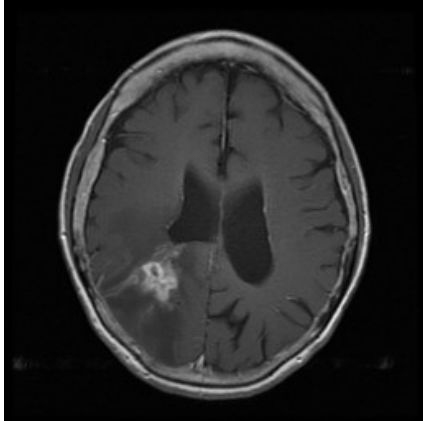

Supplement: 13041_2019_462_MOESM1_ESM.pdf [file 13041_2019_462_MOESM1_ESM.pdf]
